# Supplementary material for: Distinct synaptic pools of DAPK1 differentially regulate activity-dependent synaptic CaMKII accumulation
Source: PubMed Central journal article supplement (PMC10192646; doi:10.1016/j.isci.2023.106723), 2023-04-23
Supplement: mmc1.pdf [file mmc1.pdf]

iScience, Volume 26

**Supplemental information**

**Distinct synaptic pools of DAPK1  
differentially regulate activity-dependent  
synaptic CaMKII accumulation**

**Jonathan E. Tullis and K. Ulrich Bayer**

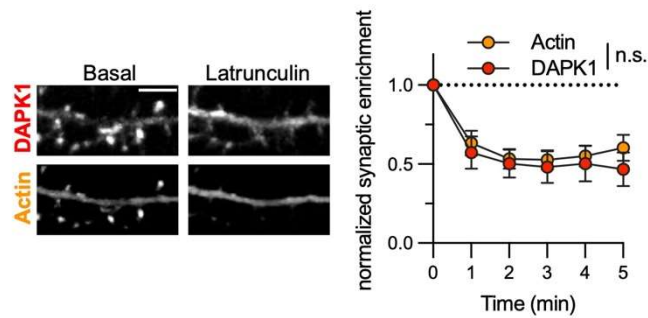

**Supplemental Figure S1. Acute application of latrunculin reduces actin and DAPK1 synaptic localization equally**, related to Figure 1.

Representative images of mCh-DAPK1 and YFP-actin (left); Scale bars, 5  $\mu\text{m}$ . Quantifications (right) show mean  $\pm$  SEM. Synaptic enrichment values were measured over time following treatment with Latrunculin B (2.5  $\mu\text{M}$ ) for 5 minutes ( $n = 3$  neurons; two-way RM ANOVA with Tukey's multiple comparison's test; time:  $p < 0.001$ ; group: not significant, n.s.).

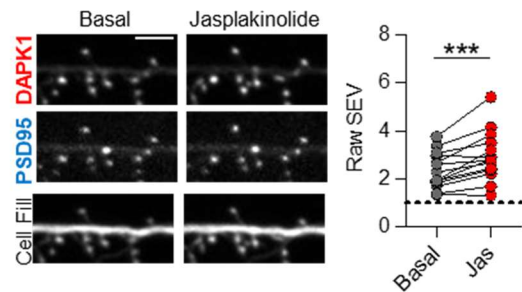

**Supplemental Figure S2. Acute application of jasplakinolide enhances DAPK1 synaptic localization**, related to Figure 1.

Quantifications show mean  $\pm$  SEM. Scale bars, 5  $\mu\text{m}$ . Stabilization of F-actin with jasplakinolide (1  $\mu\text{M}$ , 10 min) increased DAPK1 synaptic enrichment ( $n = 14$  neurons; \*\*\* $p < 0.001$  in paired two-tailed t-test).

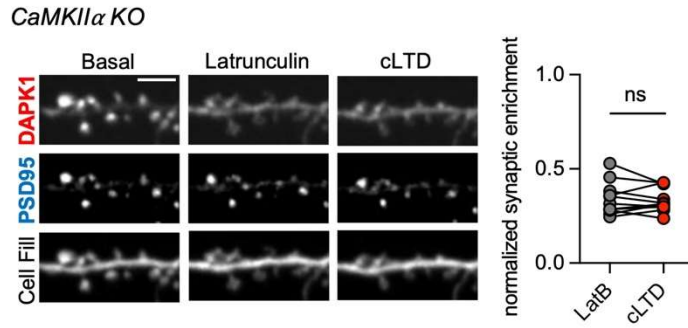

**Supplemental Figure S3. CaMKII KO does not enable LTD-induced re-accumulation of DAPK1 after synaptic removal,** related to Figure 2.

Scale bars, 5  $\mu$ m. DAPK1 does not re-accumulate to synapses by cLTD after synaptic removal by latrunculin in CaMKII KO cultures (n = 11 neurons; not significant, ns, in paired two-tailed t-test).

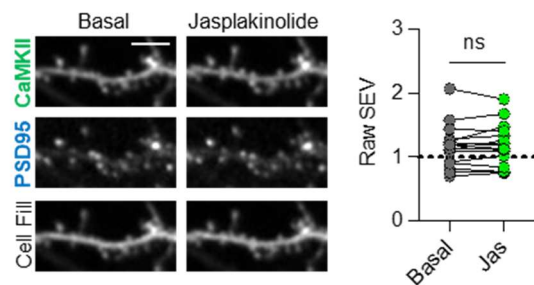

**Supplemental Figure S4. Acute application of latrunculin does not affect basal CaMKII synaptic localization,** related to Figure 4.

Scale bars, 5  $\mu$ m. Stabilization of F-actin with jasplakinolide (1 $\mu$ M, 10 min) did not affect CaMKII synaptic enrichment (n = 16 neurons; not significant, ns, in paired two-tailed t-test).

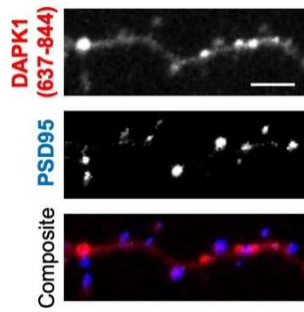

**Supplemental Figure S5. Extrasynaptic clustering of DAPK1 aa. 637-844**, related to Figure 5.

Scale bar, 5  $\mu\text{m}$ . Representative images of DAPK1 (red, aa. 637-844) and PSD-95 intrabody (blue). The DAPK1 cytoskeletal binding domain alone formed extrasynaptic clusters which were distinctly separated from PSD-95 puncta.
